# Supplementary material for: Mouse double minute 2 (MDM2) upregulates Snail expression and induces epithelial-to-mesenchymal transition in breast cancer cells in vitro and in vivo
Source: PubMed Central journal article supplement (PMC5095067; doi:10.18632/oncotarget.9287), 2016-05-11
Supplement: oncotarget-07-37177-s001.pdf [file oncotarget-07-37177-s001.pdf]

## Mouse double minute 2 (MDM2) upregulates Snail expression and induces epithelial-to-mesenchymal transition in breast cancer cells *in vitro* and *in vivo*

### SUPPLEMENTARY FIGURES

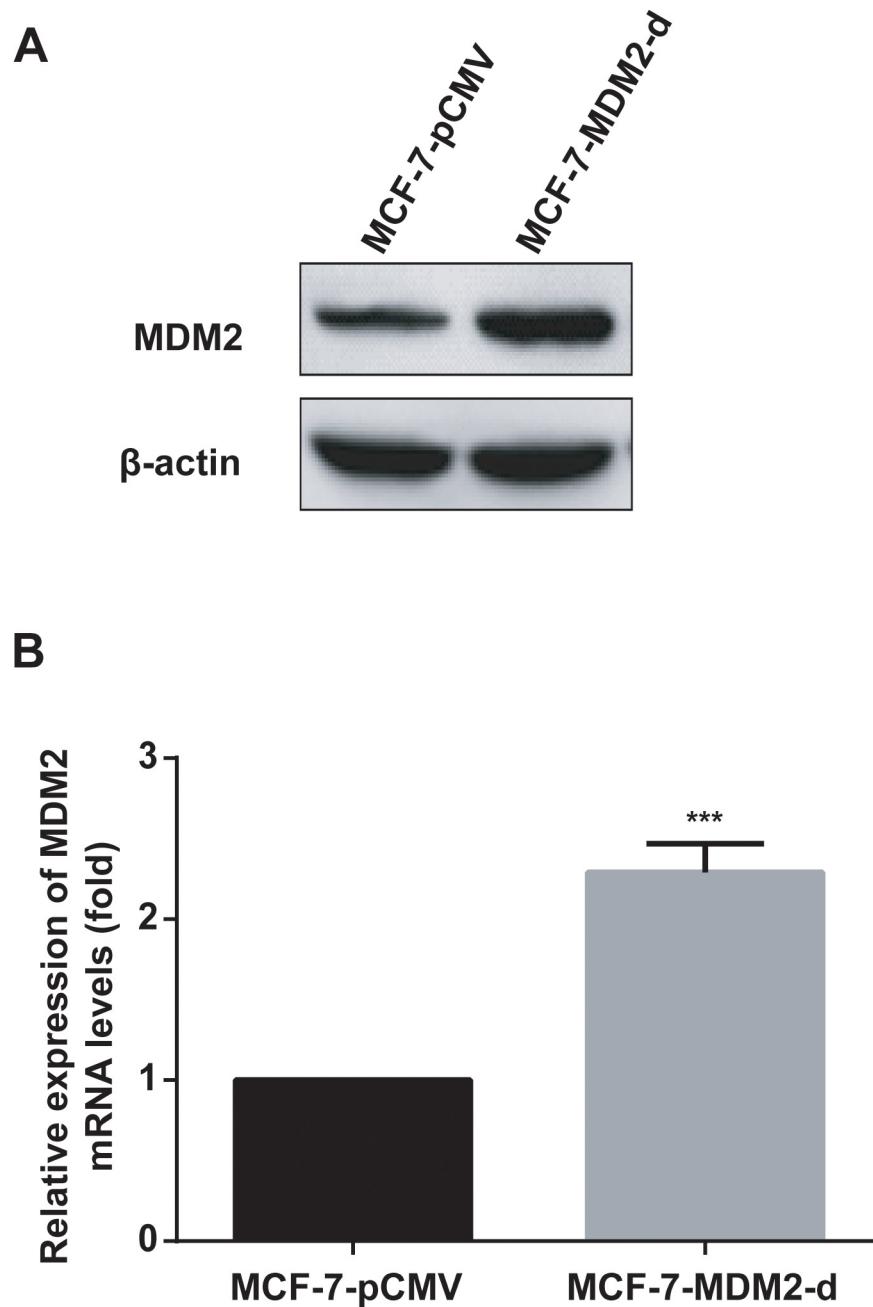

**Supplementary Figure S1: Generation of stable cell lines.** MDM2 protein expression was evaluated by western blotting in MCF-7-pCMV and MCF-7-MDM2-d cells **A**.  $\beta$ -actin was used as the loading control. MDM2 mRNA expression was analyzed by qRT-PCR in MCF-7-pCMV and MCF-7-MDM2-d cells **B**. *GAPDH* served as an internal control. \*\*\* $P < 0.001$ . The results are from three independent experiments. Error bars indicate the standard deviation.

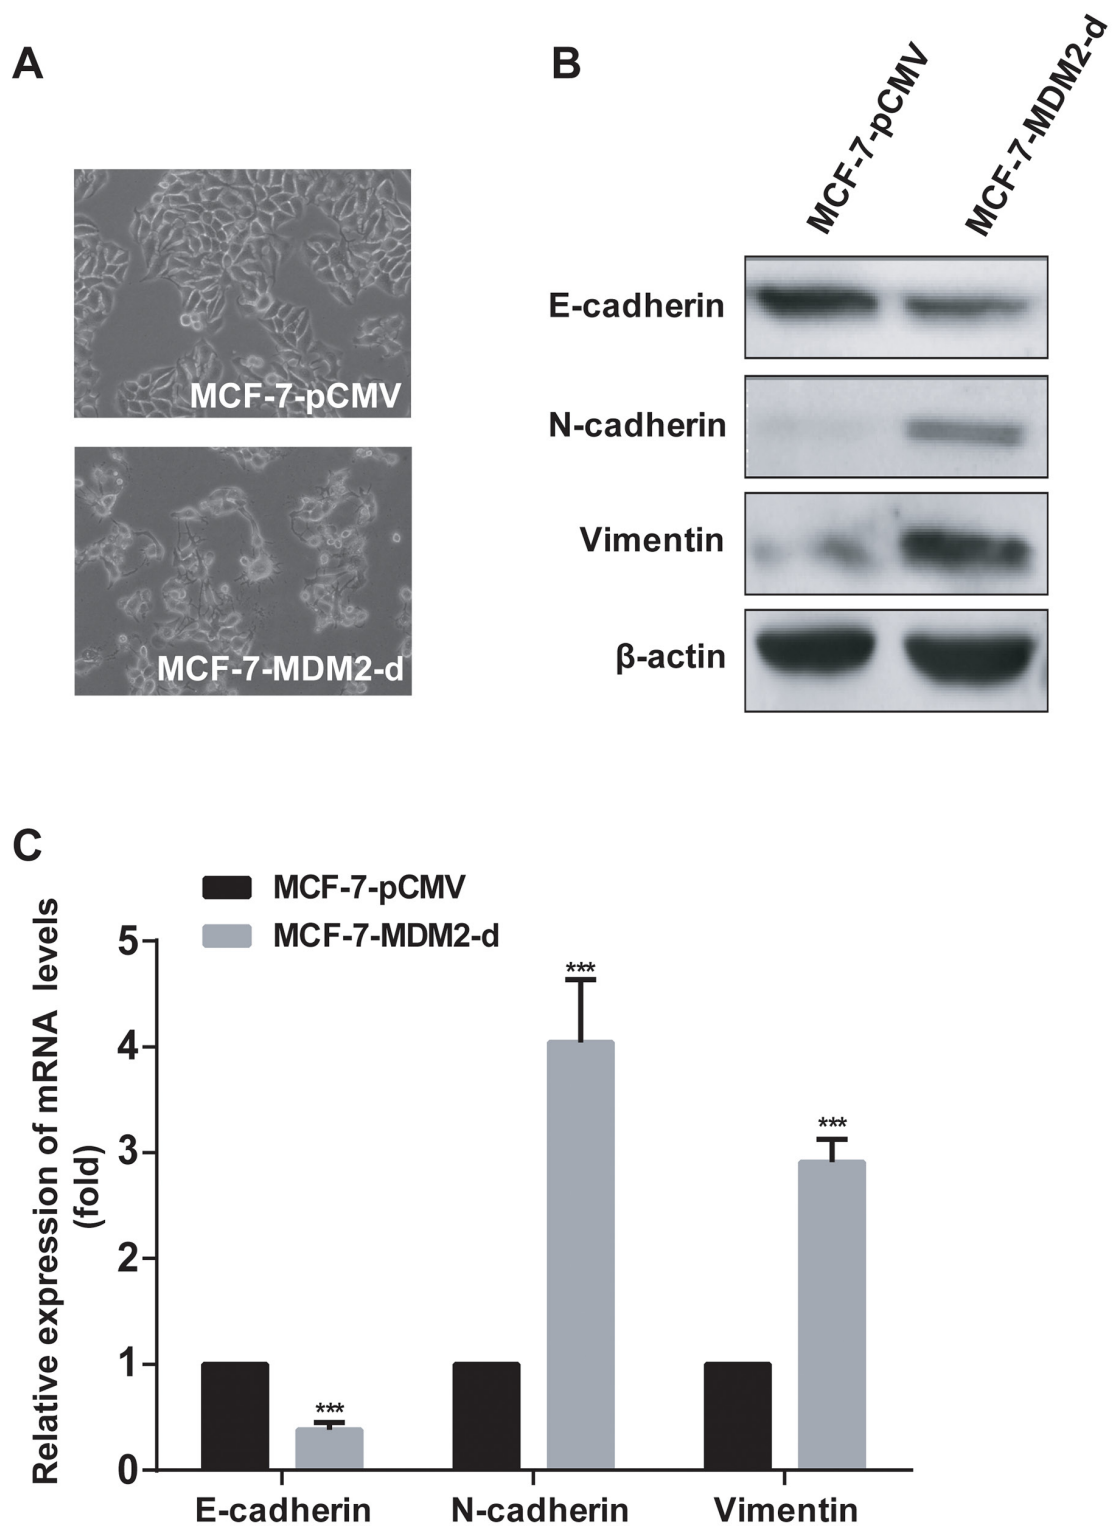

**Supplementary Figure S2: MDM2 overexpression promotes EMT in MCF-7 cells.** Representative phase-contrast images of MCF-7-pCMV and MCF-7-MDM2-d cells showed MDM2-related morphological changes **A**. (200 $\times$ ). Expression of epithelial and mesenchymal markers was evaluated by western blotting in MCF-7-pCMV and MCF-7-MDM2-d cells **B**.  $\beta$ -actin was used as the loading control. Expression of epithelial and mesenchymal markers was analyzed by qRT-PCR in MCF-7-pCMV and MCF-7-MDM2-d cells **C**. *GAPDH* served as an internal control. \*\*\* $P < 0.001$ . The results are from three independent experiments. Error bars indicate the standard deviation.

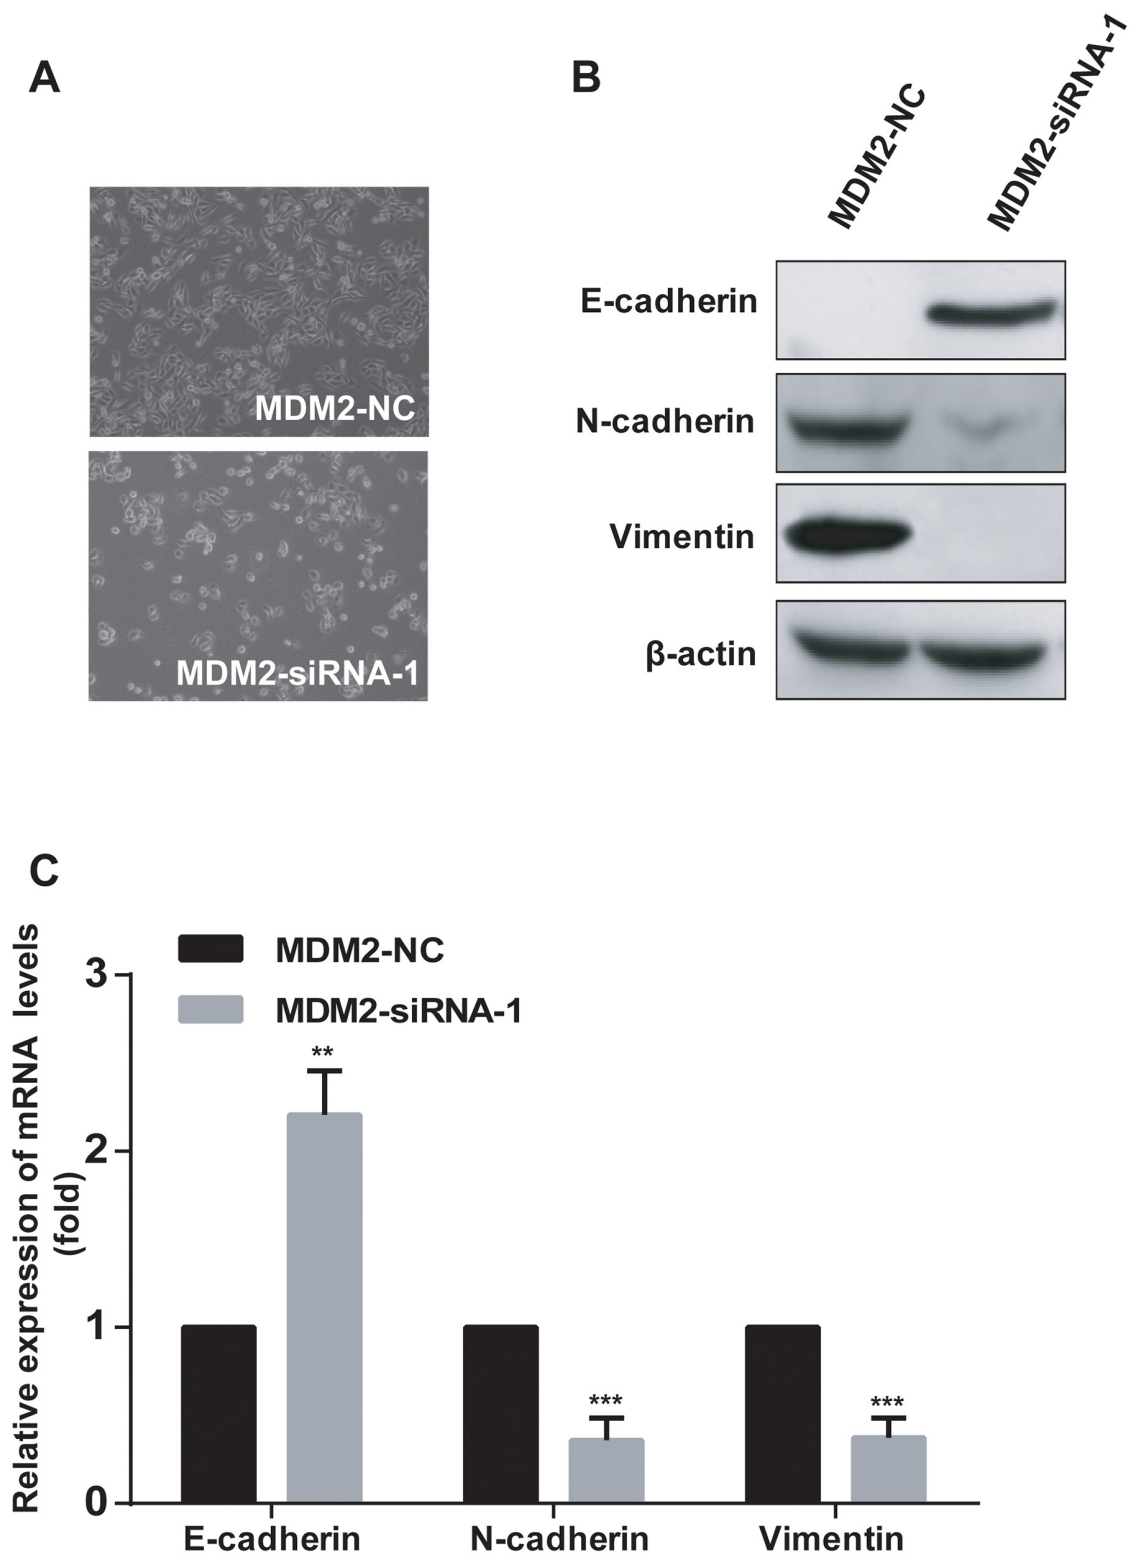

**Supplementary Figure S3: *MDM2* knockdown promotes MET in MDA-MB-231 cells.** Knockdown of *MDM2* in MDA-MB-231 cells induced morphological changes to an epithelial phenotype **A**. (200 $\times$ ). In 231-MDM2-siRNA-1 cells, qRT-PCR analyses showed increased E-cadherin and decreased N-cadherin and vimentin mRNA levels, compared with the control cells (231-MDM2-NC) **B**. In 231-MDM2-siRNA-1 cells, western blotting showed decreased N-cadherin and vimentin and increased E-cadherin protein levels **C**. \*\* $P < 0.01$  and \*\*\* $P < 0.001$ . The results are from three independent experiments. Error bars indicate the standard deviation.
